# Supplementary material for: Archetypical 2D sheet-like Cu2MoS4 for all-solid-state symmetric pseudocapacitors with ultra-steady performance efficiency
Source: Royal Society of Chemistry journal article supplement (doi:10.1039/d3se00146f), 2023-01-01
Supplement: d3se00146f1.pdf [file d3se00146f1.pdf]

## Supplementary Information

### Archetypical 2D Sheet-Like Cu<sub>2</sub>MoS<sub>4</sub> for All-Solid-State Symmetric Pseudocapacitors with Ultra-Steady Performance Efficiency

Yogesh Kumar Sonia and Sumanta Kumar Meher\*

Materials Electrochemistry & Energy storage Laboratory, Department of Chemistry, Malaviya National Institute of Technology Jaipur, Rajasthan 302017, India

Email\*: skmeher.chy@mnit.ac.in

**Table S1.** Attributions of the peaks in the survey XPS spectrum of Cu<sub>2</sub>MoS<sub>4</sub>.

| Sl. No. | Binding Energy (eV) | Attributions         |
|---------|---------------------|----------------------|
| 1       | 952.30              | Cu 2p <sub>1/2</sub> |
| 2       | 932.50              | Cu 2p <sub>3/2</sub> |
| 3       | 565.00              | Cu 3p                |
| 4       | 531                 | O 1s                 |
| 5       | 506                 | Mo 3s                |
| 6       | 411                 | Mo 3p                |
| 7       | 392                 | Mo 3p                |
| 8       | 284                 | S 2s                 |
| 9       | 228.6               | Mo 3d                |
| 10      | 161                 | S 2s                 |
| 11      | 120                 | Cu 3s                |
| 12      | 74.25               | Cu 3p                |
| 13      | 37.26               | Mo 4p                |

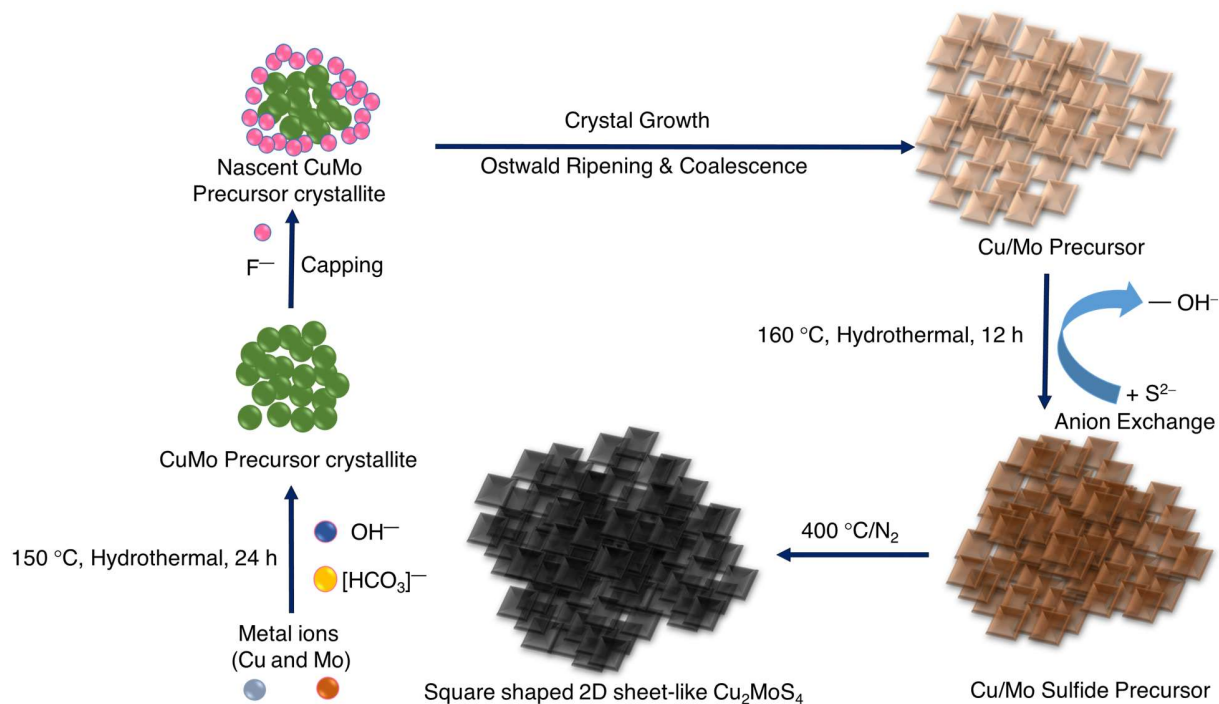

**Scheme S1.** Plausible growth mechanism and formation of square shaped 2D sheet-like Cu<sub>2</sub>MoS<sub>4</sub>.<sup>s1</sup>

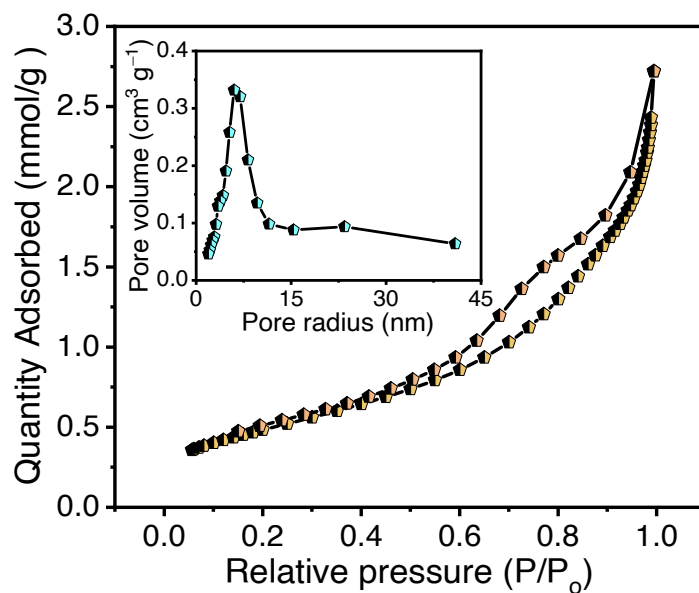

**Fig. S1** BET N<sub>2</sub> adsorption-desorption isotherm of Cu<sub>2</sub>MoS<sub>4</sub>; inset shows the BJH pore size distribution plot of Cu<sub>2</sub>MoS<sub>4</sub>.

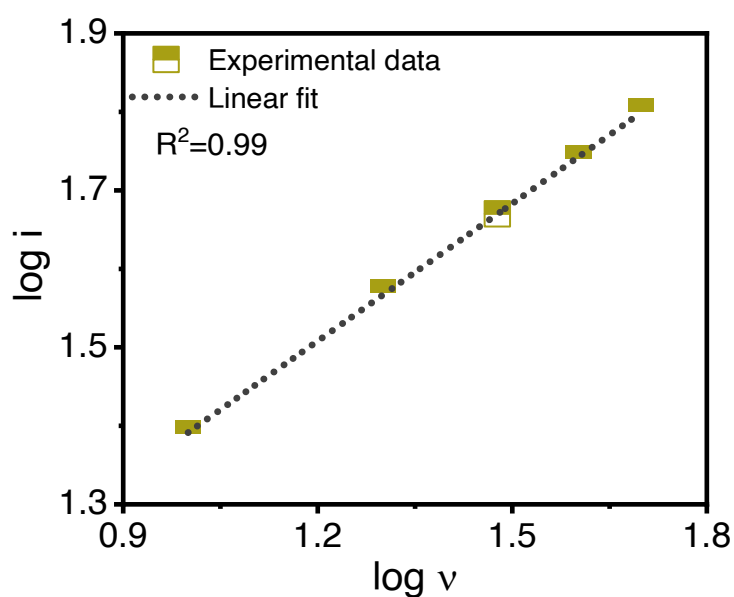

**Fig. S2**  $\log i$  vs.  $\log v$  plot of  $\text{Cu}_2\text{MoS}_4$ , when studied as the positive electrode material.

**Table S2:** Comparison of the specific capacitance of  $\text{Cu}_2\text{MoS}_4$  with the reported Cu and Mo based oxides/sulfides in 3 electrode set up.

| Sl. No. | Sample Name                    | Specific Capacitance @ Current density      | References |
|---------|--------------------------------|---------------------------------------------|------------|
| 1       | $\text{Cu}_2\text{O}$          | $144 \text{ F g}^{-1}@1 \text{ A g}^{-1}$   | s2         |
| 2       | RGO/ $\text{Cu}_2\text{O}$ /Cu | $98 \text{ F g}^{-1}@1 \text{ A g}^{-1}$    | s3         |
| 3       | $\text{Cu}_2\text{O}$ -GN      | $416 \text{ F g}^{-1}@1 \text{ A g}^{-1}$   | s4         |
| 4       | CNT@CuS                        | $122 \text{ F g}^{-1}@1.2 \text{ A g}^{-1}$ | s5         |
| 5       | H-CuS                          | $536 \text{ F g}^{-1}@8 \text{ A g}^{-1}$   | s6         |
| 6       | CuS                            | $237 \text{ F g}^{-1}@0.5 \text{ A g}^{-1}$ | s7         |
| 7       | PPy/ $\text{MoO}_3$            | $687 \text{ F g}^{-1}@1 \text{ A g}^{-1}$   | s8         |
| 8       | $\text{MoO}_3$ /C              | $331 \text{ F g}^{-1}@1 \text{ A g}^{-1}$   | s9         |

|           |                                      |                                                 |                  |
|-----------|--------------------------------------|-------------------------------------------------|------------------|
| 9         | MoO <sub>3</sub>                     | 603 F g <sup>-1</sup> @1 A g <sup>-1</sup>      | s10              |
| 10        | MoS <sub>2</sub>                     | 366 F g <sup>-1</sup> @0.5 A g <sup>-1</sup>    | s11              |
| 11        | MoS <sub>2</sub>                     | 231 F g <sup>-1</sup> @1 A g <sup>-1</sup>      | s12              |
| 12        | MoS <sub>2</sub> -rGO                | 387 F g <sup>-1</sup> @1.2 A g <sup>-1</sup>    | s13              |
| <b>13</b> | <b>Cu<sub>2</sub>MoS<sub>4</sub></b> | <b>1055 F g<sup>-1</sup>@1 A g<sup>-1</sup></b> | <b>This work</b> |

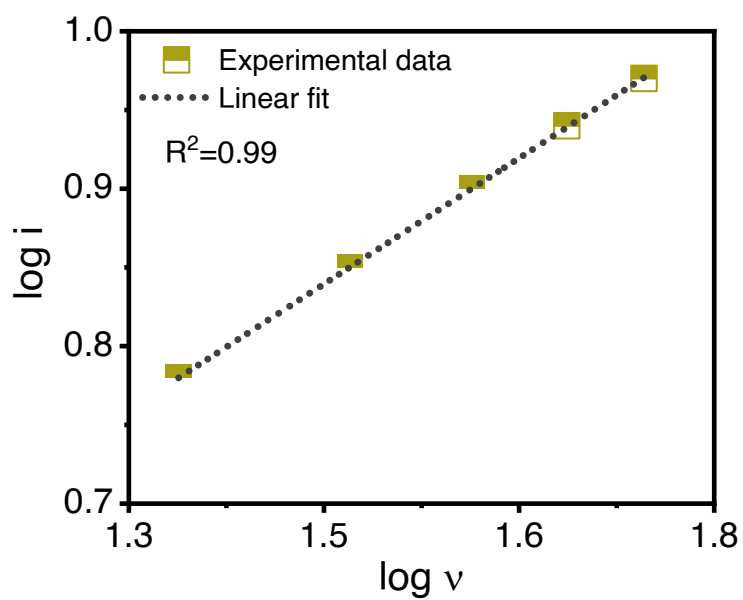

**Fig. S3**  $\log i$  vs.  $\log v$  plot of  $\text{Cu}_2\text{MoS}_4$ , when studied as the negative electrode material.

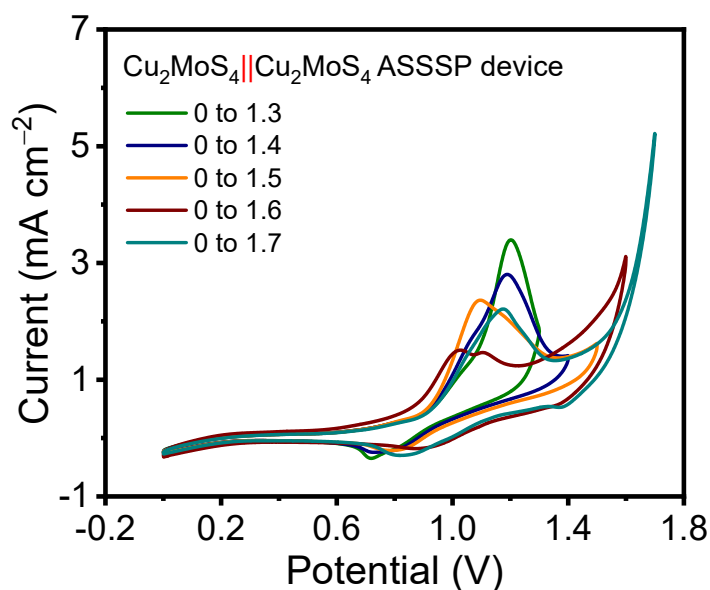

**Fig. S4** Current vs. potential plots of  $\text{Cu}_2\text{MoS}_4||\text{Cu}_2\text{MoS}_4$  ASSSP device at different potential windows.

**Table S3.** Comparison of the charge transfer resistance of  $\text{Cu}_2\text{MoS}_4$  with the reported electrode materials (for symmetric supercapacitors) in 3 electrode set up; comparison of the energy density, power density and cyclic stability of the  $\text{Cu}_2\text{MoS}_4 || \text{Cu}_2\text{MoS}_4$  ASSSP device with the reported symmetric supercapacitor devices.

| SI. No. | Symmetric device                                                                 | Charge transfer resistance in 3 electrode set up ( $R_{ct}$ ) | Energy density ( $Wh\ kg^{-1}$ ) | Power density ( $W\ kg^{-1}$ ) | Retention (%) in Cyclic Stability (No. of cycles) | References |
|---------|----------------------------------------------------------------------------------|---------------------------------------------------------------|----------------------------------|--------------------------------|---------------------------------------------------|------------|
| 1       | $\text{Fe}_3\text{O}_4/\text{Graphene}    \text{Fe}_3\text{O}_4/\text{Graphene}$ | –                                                             | 19.2                             | 800.2                          | 94% (3200)                                        | s14        |
| 2       | $\text{MnO}_2    \text{MnO}_2$                                                   | 1.2 $\Omega$                                                  | 12.7                             | 87                             | 83% (3000)                                        | s15        |
| 3       | $\text{N, S co-doped PCFF}    \text{N, S co-doped PCFF}$                         | –                                                             | 16.3                             | 147                            | 79% (10000)                                       | s16        |
| 4       | $\text{NiS}_2    \text{NiS}_2$                                                   | –                                                             | 7.97                             | 500                            | 90% (1500)                                        | s17        |

|    |                                                                      |         |       |       |               |           |
|----|----------------------------------------------------------------------|---------|-------|-------|---------------|-----------|
| 5  | MoS <sub>2</sub> /CC    MoS <sub>2</sub> /CC                         | 4.3 Ω   | 5.42  | 128   | 96.5% (5000)  | s18       |
| 6  | MnO <sub>2</sub>    MnO <sub>2</sub>                                 | 31.42 Ω | 23    | 1923  | 92% (2200)    | s19       |
| 7  | MoS <sub>2</sub> /CC    MoS <sub>2</sub> /CC                         | 0.51 Ω  | 11.1  | 250   | 87.9% (1000)  | s20       |
| 8  | NiCo <sub>2</sub> O <sub>4</sub>    NiCo <sub>2</sub> O <sub>4</sub> | –       | 30.50 | 750   | 86% (500)     | s21       |
| 9  | CMS/Ni    CMS/Ni                                                     | 0.48 Ω  | 23.61 | 1000  | 87.7% (3000)  | s22       |
| 10 | CuCo <sub>2</sub> O <sub>4</sub>    CuCo <sub>2</sub> O <sub>4</sub> | 1.89 Ω  | 16.87 | 8200  | 100.94 (3000) | s23       |
| 11 | FeS    FeS                                                           | 5.15 Ω  | 2.56  | 726   | 91% (1000)    | s24       |
| 12 | f-CFP    f-CFP                                                       | –       | 5.2   | 326   | 99% (5000)    | s25       |
| 13 | PGBC    PGBC                                                         | 0.51 Ω  | 6.68  | 100.2 | 84% (5000)    | s26       |
| 14 | HCP    HCP                                                           | –       | 9.67  | -     | 90.2% (10000) | s27       |
| 15 | NCF    NCF                                                           | –       | 1.35  | 2900  | 95.8% (1000)  | s28       |
| 16 | rGO-PMo <sub>12</sub>   <br>rGO-PMo <sub>12</sub>                    | –       | 17.20 | 130   | 89% (5000)    | s29       |
| 17 | PANI@CNFs   <br>PANI@CNFs                                            | 10.5 Ω  | 10.04 | 225   | 81% (1000)    | s30       |
| 18 | HN-CNFs/GNs   <br>HN-CNFs/GNs                                        | –       | 6.3   | 344.1 | 99% (5000)    | s31       |
| 19 | CuS/MnS@NF   <br>CuS/MnS@NF                                          | –       | 2.54  | 174.7 | 78% (2500)    | s32       |
| 20 | Cu <sub>2</sub> MoS <sub>4</sub>    Cu <sub>2</sub> MoS <sub>4</sub> | 0.45 Ω  | 30.53 | 5649  | 97.1 (10,500) | This work |

**Table S4.** Comparison of the relaxation time of the  $\text{Cu}_2\text{MoS}_4 \parallel \text{Cu}_2\text{MoS}_4$  ASSSPC device with the reported symmetric/asymmetric supercapacitor devices.

| Sl. No. | Electrode Material                          | Symmetric/Asymmetric supercapacitor device                                      | Relaxation time ( $\tau_0$ ) | Reference No. |
|---------|---------------------------------------------|---------------------------------------------------------------------------------|------------------------------|---------------|
| 1       | Carbon/Carbon supercapacitors               | Carbon $\parallel$ Carbon                                                       | 4.9 seconds                  | s33           |
| 2       | $\text{CoFe}_2\text{O}_4$ thin film         | $\text{CoFe}_2\text{O}_4 \parallel \text{CoFe}_2\text{O}_4$                     | 174 milliseconds             | s34           |
| 3       | Ti-rich $\text{TiO}_2$ tubular nanolettuces | Ti-rich $\text{TiO}_2 \parallel \text{Ti-rich TiO}_2$                           | 1.7 seconds                  | s35           |
| 4       | 3D cross-linked graphene                    | NPFG-0.3 $\parallel$ NPFG-0.3                                                   | 28.4 milliseconds            | s36           |
| 5       | Manganese oxide                             | $\text{MnO}_2 \parallel \text{NiCo}_2\text{O}_4$                                | 14 milliseconds              | s37           |
| 6       | $\alpha\text{-Fe}_2\text{O}_3$ thin film    | $\alpha\text{-Fe}_2\text{O}_3 \parallel \alpha\text{-Fe}_2\text{O}_3$           | 9 milliseconds               | s38           |
| 7       | $\text{V}_2\text{O}_5$ encapsulated MWCNTs  | $\text{V}_2\text{O}_5/\text{MWCNT} \parallel \text{V}_2\text{O}_5/\text{MWCNT}$ | 5.6 milliseconds             | s39           |
| 8       | $\text{MnO}_x/\text{Au}$ multilayers        | $\text{MnO}_x/\text{Au} \parallel \text{MnO}_x/\text{Au}$                       | 5 milliseconds               | s40           |
| 9       | Silicon nanowires (SiNWs)                   | SiNWs $\parallel$ SiNWs                                                         | 3.5 milliseconds             | s41           |
| 10      | Graphene on metal template                  | Metal graphene $\parallel$ Metal graphene                                       | 1.8 milliseconds             | s42           |
| 11      | Polymer-derived carbyne                     | Carbyne $\parallel$ Carbyne                                                     | 1.2 milliseconds             | s43           |
| 12      | Graphene                                    | Printable graphene $\parallel$ Printable graphene                               | 1 millisecond                | s44           |
| 13      | $\text{Cu}_2\text{MoS}_4$                   | $\text{Cu}_2\text{MoS}_4 \parallel \text{Cu}_2\text{MoS}_4$                     | 0.5 millisecond              | This work     |

## REFERENCES

- s1 M. K. Paliwal, Y. K. Sonia and S. K. Meher, *Mater. Today Chem.* 2021, **22**, 100551.
- s2 L. Chen, Y. Zhang, P. Zhu, F. Zhou, W. Zeng, D. D. Lu, R. Sun and C. Wong, *Sci. Rep.* **2015**, *5*, 1–7.
- s3 X. Dong, K. Wang, C. Zhao, X. Qian, S. Chen, Z. Li, H. Liu and S. Dou, *J. Alloys Compds.* **2014**, *586*, 745–753.
- s4 W. Zhang, Z. Yin, A. Chun, J. Yoo, G. Diao, Y. S. Kim and Y. Piao, *J. Power Sources* **2016**, *318*, 66–75.
- s5 T. Zhu, B. Xia, L. Zhou and X. W. D. Lou, *J. Mater. Chem.* **2012**, *22*, 7851–7855.
- s6 Y. Liu, Z. Zhou, S. Zhang, W. Luo and G. Zhang, *Applied Surface Science*, **2018**, *442*, 711–719.
- s7 J. Zhang, H. Feng, J. Yang, Q. Qin, H. Fan, C. Wei and W. Zheng, *ACS Appl. Mater. Interfaces* **2015**, *7*, 21735–21744.
- s8 X. Wu, Q. Wang, W. Zhang, Y. Wang and W. Chen, *Mater. Lett.* **2016**, *182*, 121–124.
- s9 H. Ji, X. Liu, Z. Liu, B. Yan, L. Chen, Y. Xie, C. Liu, W. Hou and G. Yang, *Adv. Funct. Mater.* **2015**, *25*, 1886–1894.
- s10 N. Zhao, H. Fan, M. Zhang, J. Ma, Z. Du, B. Yan, H. Li and X. Jiang, *Chem. Eng. J.* **2020**, *390*, 124477.
- s11 L. Jiang, S. Zhang, S. A. Kulinich, X. Song, J. Zhu, X. Wang and H. Zeng, *Mater. Res. Lett.* **2015**, *3*, 177–183.
- s12 M. Isacfranklin, L. E. M. Princy, Y. Rathinam, L. Kungumadevi, G. Ravi, A. G. Al-Sehemi and D. Velauthapillai, *Energy Fuels* **2022**, *36*, 6476–6482.
- s13 M. Saraf, K. Natarajan and S. M. Mobin, *ACS Appl. Mater. Interfaces* **2018**, *10*, 16588–16595.
- s14 S. Su, L. Lai, R. Li, Y. Lin, H. Dai and X. Zhu, *ACS Appl. Energy Mater.* 2020, **3**, 9379–9389.



- s15 G. S. Gund, D. P. Dubal, N. R. Chodankar, J. Y. Cho, P. Gomez-Romero, C. Park, C. D. Lokhande, *Sci. Rep.* 2015, **5**, 1–13.
- s16 L. Chen, Z. Wen, L. Chen, W. Wang, Q. Ai, G. Hou, Y. Li, J. Lou, L. Ci, *Carbon* 2020, **158**, 456–464.
- s17 A. M. Patil, A. C. Lokhande, N. R. Chodankar, V. S. Kumbhar and C. D. Lokhande, *Mater. Des.* 2016, **97**, 407–416.
- s18 M. S. Javed, S. Dai, M. Wang, D. Guo, L. Chen, X. Wang, C. Hu and Y. Xi, *J. Power Sources* 2015, **285**, 63–69.
- s19 N. R. Chodankar, D. P. Dubal, G. S. Gund and C. D. Lokhande, *J. Energy Chem.* 2016, **25**, 463–471.
- s20 C. Zhou, J. Wang, X. Yan, X. Yuan, D. Wang, Y. Zhu and X. Cheng, *Ceram. Int.* 2019, **45**, 21534–21543.
- s21 Z. Cao, C. Liu, Y. Huang, Y. Gao, Y. Wang, Z. Li, Y. Yan and M. Zhang, *J. Power Sources* 2020, **449**, 227571.
- s22 S. Sahoo, K. Krishnamoorthy, P. Pazhamalai and S. J. Kim, *Nanoscale* 2018, **10**, 13883–13888.
- s23 L. Liao, H. Zhang, W. Li, X. Huang, Z. Xiao, K. Xu, J. Yang, R. Zou and J. Hu, *J. Alloys Compd.* 2017, **695**, 3503–3510.
- s24 S. S. Karade, P. Dwivedi, S. Majumder, B. Pandit, B. R. Sankapal, *Sust. Energy Fuels* 2017, **1**, 1366–1375.
- s25 P. Suktha, P. Chiochan, P. Iamprasertkun, J. Wutthiprom, N. Phattharasupakun, M. Suksomboon, T. Kaewsongpol, P. Sirisinudomkit, T. Pettong and M. Sawangphruk, *Electrochim. Acta* 2015, **176**, 504–513.
- s26 Y. Gong, D. Li, C. Luo, Q. Fu and C. Pan, *Green Chem.* 2017, **19**, 4132–4140.

- s27 Y. Wang, R. Liu, Y. Tian, Z. Sun, Z. Huang, X. Wu and B. Li, *Chem. Eng. J.* 2020, **384**, 123263.
- s28 K. Xiao, L. X. Ding, G. Liu, H. Chen, S. Wang and H. Wang, *Adv. Mater.* 2016, **28**, 5997–6002.
- s29 D. P. Dubal, J. Suarez-Guevara, D. Tonti, E. Enciso, P. Gomez-Romero, *J. Mater. Chem. A* 2015, **3**, 23483–23492.
- s30 C. Hu, X. Zhang, B. Liu, S. Chen, X. Liu, Y. Liu, J. Liu and J. Chen, *Electrochim. Acta* 2020, **338**, 135846.
- s31 X. Li, X. Chen, Y. Zhao, Y. Deng, J. Zhu, S. Jiang and R. Wang, *Electrochim. Acta* 2020, **332**, 135398.
- s32 M. Zhai, Y. Cheng, Y. Jin and J. Hu, *Int. J. Hydrogen Energy* 2019, **44**, 13456–13465.
- s33 C. Portet, P. L. Taberna, P. Simon, E. Flahaut and C. Laberty-Robert, *Electrochim. Acta* 2005, **50**, 4174–4181.
- s34 J. S. Sagu, K. G. U. Wijayantha and A. A. Tahir, *Electrochim. Acta* 2017, **246**, 870–878.
- s35 M. Qorbani, O. Khajehdehi, A. Sabbah and N. Naseri, *ChemSusChem* 2019, **12**, 4064–4073.
- s36 A. Kumar, C. S. Tan, N. Kumar, P. Singh, Y. Sharma, J. Leu, E. W. Huang, T. Winie, K. H. Wei and T. Y. Tseng, *RSC Adv.* 2021, **11**, 26892–26907.
- s37 S. J. Patil, J. S. Park, Y. B. Kim and D. W. Lee, *Energy Technol.* 2018, **6**, 1380–1391.
- s38 S. N. Khatavkar and S. D. Sartale, *AIP Conference Proceedings* 2021, **2335**, 040008.
- s39 B. Pandit, D. P. Dubal, P. Gómez-Romero, B. B. Kale and B. R. Sankapal, *Sci. Rep.* 2017, **7**, 1–12.
- s40 W. Si, C. Yan, Y. Chen, S. Oswald, L. Han and O. G. Schmidt, *Energy Environ. Sci.* 2013, **6**, 3218–3223.

- s41 D. Aradilla, P. Gentile, G. Bidan, V. Ruiz, P. Gómez-Romero, T. J. Schubert, H. Sahin, E. Frackowiak and S. Sadki, *Nano Energy* 2014, **9**, 273–281.
- s42 Z. K. Wu, Z. Lin, L. Li, B. Song, K. S. Moon, S.L. Bai and C. P. Wong, *Nano Energy* 2014, **10**, 222–228.
- s43 V. K. Mariappan, K. Krishnamoorthy, S. Manoharan, P. Pazhamalai and S. J. Kim, *Small* 2021, **17**, 2102971.
- s44 Z. S. Wu, Z. Liu, K. Parvez, X. Feng and K. Müllen, *Adv. Mater.* 2015, **27**, 3669–3675.
